# Supplementary material for: The Factorial Structure of Stigma and Its Targets
Source: Atypon-hosted journal article supplement (doi:10.1027/1864-9335/a000479), 2022-03-01
Supplement: 1864-9335_a000479_esm1.pdf [file 1864-9335_a000479_esm1.pdf]

Table E1: *Actual target description wordings used in the survey*

Target description

A native American adult (indigenous person)  
A white man  
A white woman  
A black man  
A black woman  
A traditionally dressed Muslim man  
A traditionally dressed Muslim woman  
A traditional (orthodox) dressed Jewish person  
An obese man  
An obese woman  
An adult with paralyzed legs in a wheelchair  
An adult with Down syndrome  
An adult widely known to be a heroin addict  
An adult widely known to be an alcoholic  
An adult widely known to have heart disease  
An adult widely known to have leukemia (blood cancer)  
An adult widely known to have asthma  
An adult widely known to have epilepsy  
A healthy-looking adult widely known to have AIDS  
A healthy-looking adult widely known to be carrying herpes  
A healthy-looking adult widely known to have a contagious tropical disease  
A sick looking adult widely known to have AIDS  
A sick looking adult widely known to have the flu  
A sick looking adult widely known to have a contagious tropic disease  
An adult with a large facial birthmark  
An adult with an amputated leg  
An adult with severe facial acne  
An adult widely known to have schizophrenia  
An adult widely known to have depression  
An adult widely known to have dementia  
An innocent person who is widely known to have served a prison term  
A business-person publicly accused of committing fraud  
A person released from prison who had committed a notorious murder  
A person released from prison who is widely known to have molested many children  
A person widely known to be a drug dealer  
A person who is widely known to work as a garbage (waste) collector  
A person widely known to be a mortician  
An elderly person  
A person known to be unemployed  
An adult widely known to be homeless  
A mother widely known to be single  
A man widely known to be homosexual  
A woman widely known to be a lesbian  
A person widely known to be transgender  
A man widely known to be a homosexual prostitute  
A woman widely known to be a prostitute  
An ugly man  
An ugly woman  
A person widely known to be a member of a far-right political group  
A person widely known to be a member of a far-left political group  
A person widely known to be unlucky  
An adult with lung cancer
