# Supplementary material for: The Factorial Structure of Stigma and Its Targets
Source: Atypon-hosted journal article supplement (doi:10.1027/1864-9335/a000479), 2022-03-01
Supplement: 1864-9335_a000479_esm6.pdf [file 1864-9335_a000479_esm6.pdf]

Table E5. Complete target rankings (ranked highest to lowest) for each stigma class

| Interpersonal         | Chronic               | Morality-based        |
|-----------------------|-----------------------|-----------------------|
| Homeless              | Heroin addict         | Child molester        |
| Sick AIDS             | Murderer              | Drug dealer           |
| Sick contagious       | Homeless              | Murderer              |
| Child molester        | Woman prostitute      | Heroin addict         |
| Heroin addict         | Transgender           | Business fraud        |
| Schizophrenia         | Child molester        | Woman prostitute      |
| Obese man             | Sick AIDS             | Alcoholic             |
| Ugly woman            | Homosexual prostitute | Homosexual prostitute |
| Murderer              | Schizophrenia         | Homeless              |
| Healthy contagious    | Obese woman           | Conservative          |
| Down syndrome         | Healthy AIDS          | Sick AIDS             |
| Dementia              | Homosexual            | Healthy Herpes        |
| Elderly               | Muslim man            | Sick contagious       |
| Transgender           | Down syndrome         | Healthy AIDS          |
| Alcoholic             | Alcoholic             | Schizophrenia         |
| Obese woman           | Drug dealer           | Muslim man            |
| Ugly man              | Muslim woman          | Healthy contagious    |
| Wheelchair            | Obese man             | Innocent ex-prisoner  |
| Healthy AIDS          | Black man             | Sick Herpes           |
| Depression            | Sick contagious       | Ugly woman            |
| Woman prostitute      | Business fraud        | Unemployed            |
| Homosexual prostitute | Ugly woman            | Ugly man              |
| Facial acne           | Ugly man              | Homosexual            |
| Healthy Herpes        | Lesbian               | Depression            |
| Muslim man            | Healthy contagious    | Unlucky               |
| Unemployed            | Dementia              | White man             |
| Amputated leg         | Innocent ex-prisoner  | Obese woman           |
| Drug dealer           | Wheelchair            | Muslim woman          |
| Muslim woman          | Healthy Herpes        | Black man             |
| Leukaemia             | Jewish person         | Liberal               |
| Innocent ex-prisoner  | Elderly               | Dementia              |
| Sick Herpes           | Amputated leg         | Obese man             |
| Business fraud        | Black woman           | Lung cancer           |
| Lung cancer           | Native American       | Facial acne           |
| Facial birthmark      | Unemployed            | Lesbian               |
| Unlucky               | Garbage collector     | Single mother         |
| Mortician             | Facial acne           | Transgender           |
| Jewish person         | Epilepsy              | Heart disease         |
| Homosexual            | Facial birthmark      | White woman           |
| Garbage collector     | Liberal               | Mortician             |
| Lesbian               | Depression            | Amputated leg         |
| Conservative          | Single mother         | Leukaemia             |
| Native American       | Conservative          | Garbage collector     |
| Epilepsy              | Unlucky               | Facial birthmark      |
| Single mother         | Lung cancer           | Black woman           |
| Heart disease         | Mortician             | Elderly               |
| Black man             | Leukaemia             | Epilepsy              |
| Liberal               | Sick Herpes           | Jewish person         |
| White man             | Heart disease         | Wheelchair            |
| Black woman           | White man             | Native American       |
| White woman           | White woman           | Down syndrome         |
| Asthma                | Asthma                | Asthma                |
